# Supplementary material for: Towards a new combination therapy for tuberculosis with next generation benzothiazinones
Source: PubMed Central journal article supplement (PMC3958311; doi:10.1002/emmm.201303575), 2014-02-05
Supplement: emmm0006-0372-sd2.pdf [file emmm0006-0372-sd2.pdf]

## Supplementary figures

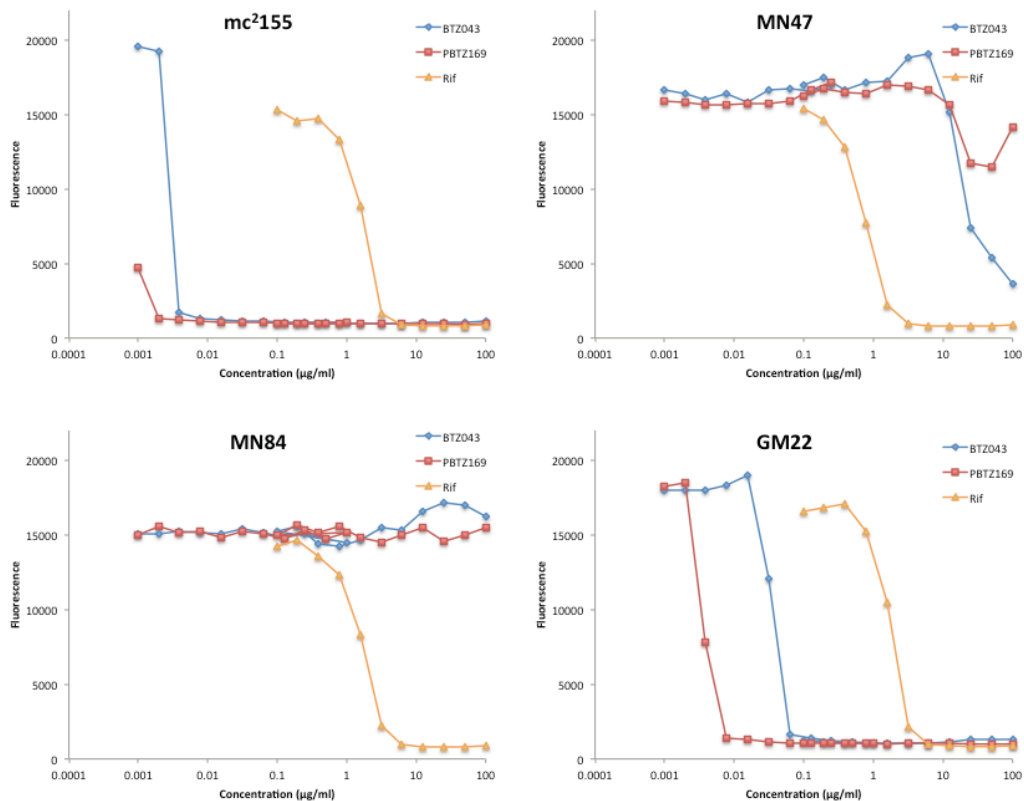

**Figure S1. Susceptibility of BTZ-resistant mutants of *M. smegmatis* to PBTZ169.** Susceptibility was measured using REMA with fluorescence units shown on the Y-axis. **A.** Wild-type parental strain mc<sup>2</sup>155; **B.** BTZ-resistant mutant MN47 (Cys394Ser); **C.** BTZ-resistant mutant with MN84 (Cys394Ser); **D.** BTZ-resistant mutant GM22 overproducing NfnB nitroreductase.
