# Supplementary material for: Towards a new combination therapy for tuberculosis with next generation benzothiazinones
Source: PubMed Central journal article supplement (PMC3958311; doi:10.1002/emmm.201303575), 2014-02-05
Supplement: emmm0006-0372-sd3.pdf [file emmm0006-0372-sd3.pdf]

A.

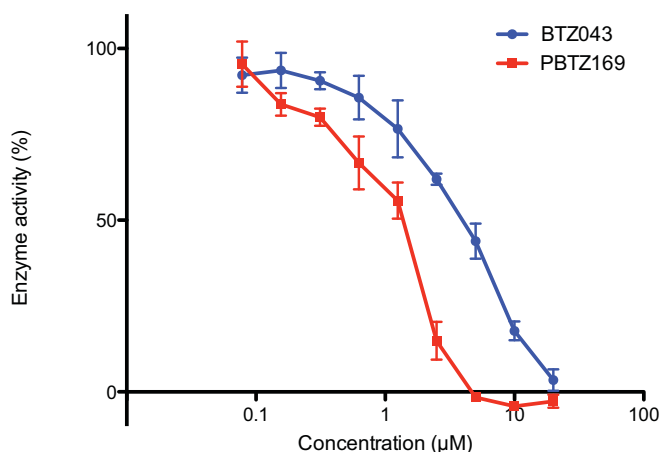

B.

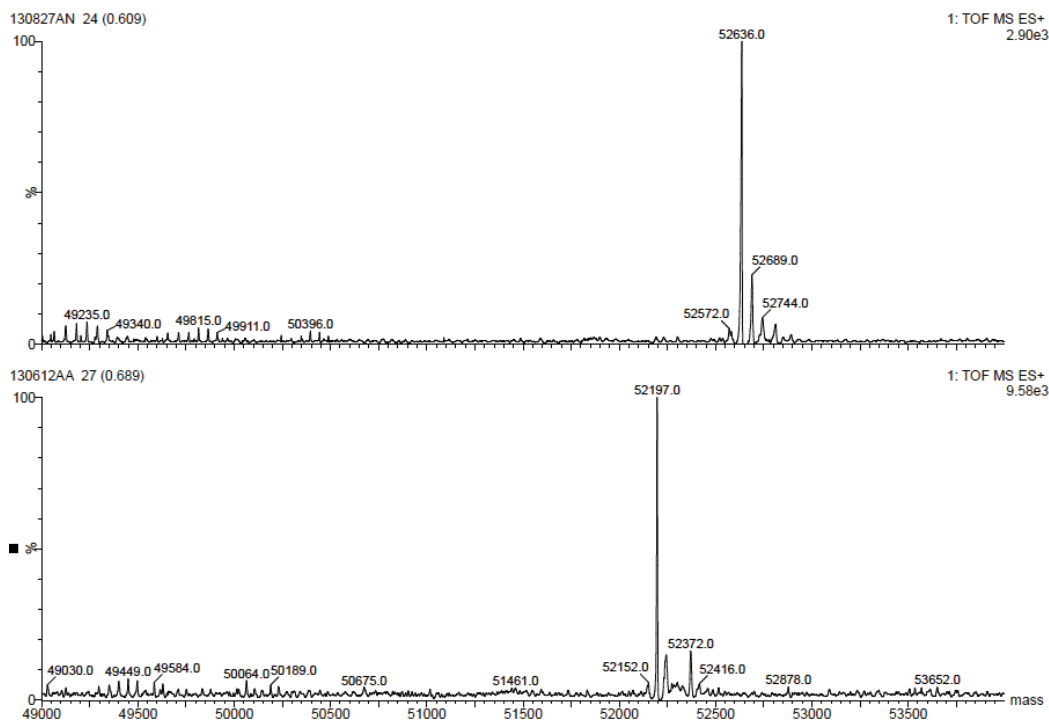

**Figure S2. Enzyme inhibition and mass spectrometry analysis of the covalent DprE1-inhibitor adducts.** A. DprE1 residual activity following a 5 min. incubation with BTZ043 or PBTZ169 (0-20 µM) in presence of 200 µM FPR, measured by a peroxidase-coupled assay, using Amplex Red as a substrate. The enzyme (5 µM) was incubated at 30 °C with inhibitor and 200 µM FPR. An aliquot was taken and diluted in the assay mixture containing 400 µM FPR, 0.2 µM horseradish peroxidase and 50

$\mu$ M Amplex Red. The peroxidase activity was then assessed by continuous measurement of the fluorescence with excitation/emission wavelengths of 560/590 nm, respectively. Datapoints are the average of triplicate experiments, expressed as the percentage of the control (no inhibitor), and error bars show the observed standard error of the mean.

**B.** Deconvoluted mass spectrometry analysis of *M. tuberculosis* DprE1 after exposure to PBTZ169 in presence of the substrate FPR (top panel), and a protein only control (bottom panel). The protein expressed in *E. coli* presents a mass loss of 131 mass units compared to the expected mass (52326), corresponding to the excision of a methionine residue. Loss of the N-terminal methionine of proteins expressed in *E. coli* is often reported, especially when the second residue is a glycine, as here (Hirel et al., 1989). The expected masses were therefore 52195 (free protein) and 52635 (PBTZ169-DprE1 semimercaptal adduct).
