# Supplementary material for: Towards a new combination therapy for tuberculosis with next generation benzothiazinones
Source: PubMed Central journal article supplement (PMC3958311; doi:10.1002/emmm.201303575), 2014-02-05
Supplement: emmm0006-0372-sd6.pdf [file emmm0006-0372-sd6.pdf]

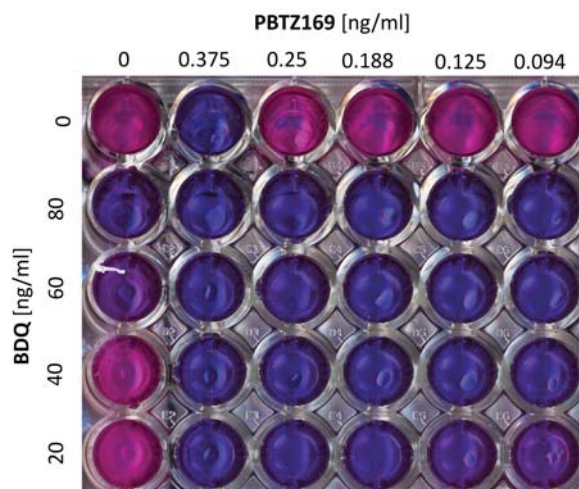

**Figure S5. REMA of PBTZ169-Bedaquiline *in vitro* combinations against *M. tuberculosis* H<sub>37</sub>Rv.** The effect of serial dilutions of PBTZ169 and BDQ in combination on the viability of *M. tuberculosis* H37Rv was assessed after 7 days exposure. The combinations of sub-inhibitory concentrations of the two compounds are synergistic and prevent resazurin turnover.
