# Supplementary material for: Towards a new combination therapy for tuberculosis with next generation benzothiazinones
Source: PubMed Central journal article supplement (PMC3958311; doi:10.1002/emmm.201303575), 2014-02-05
Supplement: emmm0006-0372-sd7.pdf [file emmm0006-0372-sd7.pdf]

## Supplementary tables

**Table S1.** PBTZ (2-[4-R-piperazin-1-yl]-8-nitro-6-(trifluoromethyl)-4H-1,3-benzothiazin-4-ones) analogues synthesized and their activity on *M. tuberculosis* H37Rv

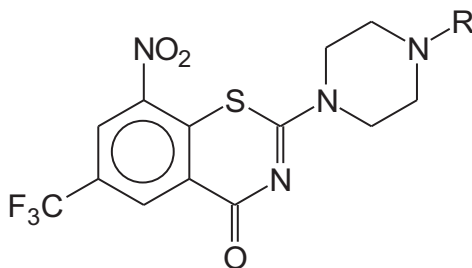

| Compound        | R                        | Molecular weight | LogP <sup>a</sup> | MIC (ng/ml)  |
|-----------------|--------------------------|------------------|-------------------|--------------|
| 10626038        | 4-chlorophenyl           | 470.8606         | 3.90              | >1000        |
| 10626041        | 3-chloro-6-methyl-phenyl | 484.8877         | 3.72              | >1000        |
| 10626044        | 3-trifluoromethylphenyl  | 504.4140         | 4.27              | >1000        |
| 10626045        | 4-fluorophenyl           | 454.4060         | 3.53              | 50           |
| 10626057        | diethylcarboxamide       | 459.4504         | 1.44              | 32           |
| 10726001        | 4-methylphenyl           | 450.4427         | 3.85              | >1000        |
| 10726002        | phenyl                   | 436.4156         | 3.39              | 25           |
| 10726004        | 2-fluorophenyl           | 454.4060         | 3.53              | >1000        |
| 10726019        | benzyl                   | 450.4427         | 3.01              | >500         |
| 10726040        | 2-phenylethyl            | 464.4698         | 3.26              | 5            |
| 10726044        | allyl                    | 400.3822         | 1.97              | 1500         |
| 10726045        | Pyridine-2               | 437.4032         | 3.24              | >1000        |
| 10726046        | 4-methoxyphenyl          | 466.4421         | 3.13              | >1000        |
| 10726047        | 2-methoxyphenyl          | 466.4421         | 3.13              | >1000        |
| 10726048        | 1,3-benzodioxol-5-yl     | 480.4256         | 3.07              | >1000        |
| 10726049        | 3-phenylprop-2-en-1-yl   | 476.4809         | 3.67              | 10           |
| <b>10926013</b> | <b>methyl</b>            | <b>374.3439</b>  | <b>1.31</b>       | <b>250</b>   |
| 10926017        | Dimethyl iodide          | 516.2834         | 0.76              | >1000        |
| 10926019        | 1-methylpiperidine-4-yl  | 457.4781         | 2.64              | >1000        |
| <b>10926021</b> | <b>ethyl</b>             | <b>388.3710</b>  | <b>1.64</b>       | <b>62</b>    |
| 10926023        | 3,4,5-trimethoxyphenyl   | 540.5222         | 2.63              | 250          |
| <b>10926027</b> | <b>propyl</b>            | <b>402.3981</b>  | <b>2.11</b>       | <b>3.7</b>   |
| 10926168        | cyclohexyl               | 442.4634         | 3.09              | 0.75         |
| <b>PBTZ169</b>  | <b>cyclohexylmethyl</b>  | <b>456.4905</b>  | <b>3.20</b>       | <b>≤0.19</b> |

Table S1 (continued)

| Compound        | R                              | Molecular weight | LogP <sup>a</sup> | MIC (ng/ml) |
|-----------------|--------------------------------|------------------|-------------------|-------------|
| 10926170        | 1,3-dioxolan-2-ylmethyl        | 446.4080         | 1.06              | 31          |
| 10926171        | tetrahydrofuran-2-ylmethyl     | 444.4357         | 1.51              | 7.5         |
| <b>10926172</b> | <b>butyl</b>                   | <b>416.4252</b>  | <b>2.51</b>       | <b>1.9</b>  |
| 10926173        | 2-methoxyethyl                 | 418.3975         | 2.07              | 31          |
| 11026088        | isopropyl                      | 402.3981         | 2.99              | 7.5         |
| 11026096        | ethyl carboxylate              | 432.3810         | 2.50              | 31          |
| <b>11026100</b> | <b>isobutyl</b>                | <b>416.4252</b>  | <b>2.51</b>       | <b>≤1.9</b> |
| 11026117        | ethyl-2-morpholine             | 473.4775         | 1.78              | 375         |
| 11026119        | N-isopropylacetamide           | 459.4504         | 1.91              | 375         |
| 11026120        | N,N-dimethylamine-3-prop-1-yl  | 445.4669         | 2.26              | 125         |
| 11026122        | N,N-diethylamine-2-etan-1-yl   | 487.5482         | 2.83              | 1.5         |
| 11026125        | 2-ethanol                      | 404.3704         | 0.79              | 750         |
| 11026126        | 3-propanitril                  | 413.3809         | 1.41              | 190         |
| 11026127        | N,N-dimethylamine-3-ethan-1-yl | 431.4399         | 1.21              | 3100        |
| <b>11026128</b> | <b>1-sec-butyl</b>             | <b>416.4252</b>  | <b>2.52</b>       | <b>0.37</b> |
| <b>11026129</b> | <b>2-cyclohexylethyl</b>       | <b>470.5176</b>  | <b>3.52</b>       | <b>0.19</b> |
| 11026130        | 2-oxo-2-piperidin-1-ylethyl    | 485.4886         | 1.12              | 7.5         |
| <b>11026131</b> | <b>1-methylbutyl</b>           | <b>430.4523</b>  | <b>3.11</b>       | <b>0.19</b> |
| 11026132        | (1-methylpiperidin-4-yl)methyl | 471.5052         | 1.63              | 3100        |
| 11026133        | cyclopentyl                    | 428.4363         | 2.42              | 1.5         |
| <b>11026134</b> | <b>heptyl</b>                  | <b>458.5065</b>  | <b>3.30</b>       | <b>0.19</b> |
| 11026135        | pyridine-4-ylmethyl            | 451.4303         | 2.63              | 15          |
| 11026137        | 4-phenoxybutyl                 | 508.5234         | 3.35              | 1.5         |
| 11026138        | 3-methoxypropyl                | 432.4246         | 2.12              | 3.75        |
| 11026139        | 4-phenylbutyl                  | 492.5240         | 4.05              | 0.37        |
| 11026140        | 3-pyridin-4-ylpropyl           | 552.4064         | 3.27              | 3100        |
| 11026141        | pentyl                         | 430.4523         | 2.84              | 0.37        |
| <b>11026142</b> | <b>1-ethylpropyl</b>           | <b>430.4523</b>  | <b>2.99</b>       | <b>0.37</b> |
| 11026167        | cyclopropylmethyl              | 414.4092         | 2.94              | 3.75        |
| <b>11026168</b> | <b>2-ethylisonicotinate</b>    | <b>509.4673</b>  | <b>3.09</b>       | <b>500</b>  |
| 11027187        | 3-cyclohexylpropyl             | 484.5447         | 3.85              | ≤1.9        |
| 11026188        | 1-adamantyl                    | 494.5399         | 2.95              | 15          |
| 11026189        | (2-cyclohexyl-methoxy)ethyl    | 494.4963         | 2.97              | 19          |
| 11026191        | 2-(4-fluorophenoxy)ethyl       | 512.4867         | 2.99              | ≤1.9        |
| 11126039        | benzoyl                        | 464.4262         | 2.45              | 16          |

<sup>a</sup> Calculated using Hyperchem 7.5 (Hypercube Inc., <http://www.hyper.com>)
