# Supplementary material for: Towards a new combination therapy for tuberculosis with next generation benzothiazinones
Source: PubMed Central journal article supplement (PMC3958311; doi:10.1002/emmm.201303575), 2014-02-05
Supplement: emmm0006-0372-sd8.pdf [file emmm0006-0372-sd8.pdf]

**Table S2. Susceptibility of clinical isolates to PBTZ169 and INH**

| Strain/clinical isolates of <i>M. tuberculosis</i> | Resistance to | Type      | MIC ( $\mu\text{g/mL}$ ) PBTZ169 | MIC ( $\mu\text{g/mL}$ ) INH |
|----------------------------------------------------|---------------|-----------|----------------------------------|------------------------------|
| H37Rv                                              | -             | Sensitive | 0.031                            | 0.125                        |
| 4328                                               | -             | Sensitive | 0.063                            | 0.125                        |
| 6341                                               | HSRE          | MDR       | 0.031                            | >20                          |
| 6374                                               | HSRE          | MDR       | 0.063                            | >20                          |
| 5055                                               | HSRE          | MDR       | 0.063                            | >20                          |
| 5253                                               | HSREKmRbZ     | pre-XDR   | 0.063                            | >20                          |
| 6412                                               | HSRE          | MDR       | 0.031                            | >20                          |
| 6448                                               | HSRE          | MDR       | 0.063                            | >20                          |
| 6418                                               | HSREKmFQ      | XDR       | 0.063                            | >20                          |
| 7384                                               | HSREKmFQ      | XDR       | 0.063                            | >20                          |

Strains 4328, 6341, 6374, 5055, 5253, 6412, 6448, 6418, and 7384 are clinical isolates from patients of the Central Institute of Tuberculosis (Moscow, Russia) where drug susceptibility testing was performed using solid Löwenstein-Jensen medium. The results were read after 21-28 days of incubation at 37°C. Controls were tubes cultured with test-strains not treated with the studied agents. Drugs: H, isoniazid (INH); S, streptomycin; R, rifampicin; E, ethambutol; Km, kanamycin; Rb, rifabutin; Z, pyrazinamide; FQ, fluoroquinolone. Note that the MICs for PBTZ169 are higher than in Table 2 in the main text due to the use of solid medium.
