# Supplementary material for: Towards a new combination therapy for tuberculosis with next generation benzothiazinones
Source: PubMed Central journal article supplement (PMC3958311; doi:10.1002/emmm.201303575), 2014-02-05
Supplement: emmm0006-0372-sd9.pdf [file emmm0006-0372-sd9.pdf]

**Table S3. Data collection and refinement statistics for the DprE1-PBTZ169 structure**

---

| <b>DprE1-PBTZ169</b>                                |                      |
|-----------------------------------------------------|----------------------|
| <b>Data collection</b>                              |                      |
| Space group                                         | P2 <sub>1</sub>      |
| Cell dimensions                                     |                      |
| <i>a, b, c</i> (Å)                                  | 73.05, 85.00, 81.37  |
| $\alpha, \beta, \gamma$ (°)                         | 90.00, 101.10, 90.00 |
| Resolution (Å)                                      | 50.0-1.9             |
| <i>R</i> <sub>meas</sub>                            | 6.6 (52.1)           |
| <i>I</i> / $\sigma I$                               | 10.4 (2.1)           |
| Completeness (%)                                    | 95.3 (84.9)          |
| Redundancy                                          | 2.3 (2.3)            |
| <b>Refinement</b>                                   |                      |
| Resolution (Å)                                      | 1.90                 |
| <i>R</i> <sub>work</sub> / <i>R</i> <sub>free</sub> | 0.19/0.24            |
| No. atoms                                           |                      |
| Protein                                             | 6456                 |
| PBTZ/FAD                                            | 60/106               |
| Water                                               | 255                  |
| <i>B</i> -factor (Å <sup>2</sup> )                  | 38.2                 |
| R.m.s deviations                                    |                      |
| Bond lengths (Å)                                    | 0.022                |
| Bond angles (°)                                     | 2.20                 |
| 1 crystal used for the structure.                   |                      |
| *Highest resolution shell is shown in parenthesis.  |                      |

---
