# Supplementary material for: Towards a new combination therapy for tuberculosis with next generation benzothiazinones
Source: PubMed Central journal article supplement (PMC3958311; doi:10.1002/emmm.201303575), 2014-02-05
Supplement: emmm0006-0372-sd10.pdf [file emmm0006-0372-sd10.pdf]

**Table S4. Selected *in vitro* ADME/T values**

### **Cytotoxicity**

BTZ043 and PBTZ169 were tested for cytotoxicity against HepG2 by REMA in triplicate. Toxic doses inhibiting 99% and 50% of the population are expressed as TD<sub>99</sub> and TD<sub>50</sub>. BTZ043 is around 10 fold more cytotoxic than PBTZ169 for HepG2 cells

|                | TD <sub>99</sub><br>(µg/ml) | TD <sub>50</sub><br>(µg/ml) |
|----------------|-----------------------------|-----------------------------|
| <b>BTZ043</b>  | 25                          | 5                           |
| <b>PBTZ169</b> | >200                        | 58                          |

### **Microsomal stability**

Intrinsic clearance (Cl<sub>int</sub>: measured in µl/min/mg protein) was measured using both mouse and human liver microsomes. Compound concentrations were measured by HPLC-UV following 0, 5, 10, 15 and 30 min incubation of the compound with microsomes. Carbamazepine acts as a control for low intrinsic clearance, while nifedipine is a control for high intrinsic clearance. BTZ043 and PBTZ169 both show intermediate intrinsic clearance.

| <b>Microsomes</b> | <b>1 µg/mL<br/>Carbamazepine</b> | <b>1 µg/mL<br/>Nifedipine</b> | <b>1 µM<br/>BTZ043</b> | <b>1 µM<br/>PBTZ169</b> |
|-------------------|----------------------------------|-------------------------------|------------------------|-------------------------|
| <b>Mouse</b>      | 1.1                              | 64.8                          | 12.2                   | 24.3                    |
| <b>Human</b>      | 0.5                              | 72.3                          | 16.0                   | 24.8                    |
