# Supplementary material for: Towards a new combination therapy for tuberculosis with next generation benzothiazinones
Source: PubMed Central journal article supplement (PMC3958311; doi:10.1002/emmm.201303575), 2014-02-05
Supplement: emmm0006-0372-sd11.pdf [file emmm0006-0372-sd11.pdf]

**Table S5. Principal pharmacokinetic properties<sup>1</sup>**

|             |                                      | BTZ043  | PBTZ169 |
|-------------|--------------------------------------|---------|---------|
| $C_{\max}$  | [ $\mu\text{g/L}$ ]                  | 1922.9  | 1849.1  |
| $\lambda_z$ | [ $\text{min}^{-1}$ ]                | 0.00694 | 0.00623 |
| $t_{1/2z}$  | [min]                                | 99.9    | 111.3   |
| AUC         | [ $\text{min} \cdot \mu\text{g/L}$ ] | 259829  | 193487  |

<sup>1</sup> See Figure S5 for primary data. Non-compartmental calculations gave these parameter estimates. Compound levels were measured in serum from individual female mice (3/time point) that had received a single dose of 25 mg/kg. Maximum concentration ( $C_{\max}$ ); area under the curve (AUC); apparent clearance.
