# Supplementary material for: Towards a new combination therapy for tuberculosis with next generation benzothiazinones
Source: PubMed Central journal article supplement (PMC3958311; doi:10.1002/emmm.201303575), 2014-02-05
Supplement: emmm0006-0372-sd12.pdf [file emmm0006-0372-sd12.pdf]

**Table S6. Statistical comparison of *in vivo* combination therapies<sup>1</sup>**

| <b>Log<sub>10</sub> CFU reduction compared to standard combination RIF-INH-PZA</b> |                     |                                     |                      |                     |                                     |
|------------------------------------------------------------------------------------|---------------------|-------------------------------------|----------------------|---------------------|-------------------------------------|
| <b>Lungs</b>                                                                       | p value<br>(t test) | Signif.different<br><i>p</i> < 0.05 | <b>Spleen</b>        | p value<br>(t test) | Signif.different<br><i>p</i> < 0.05 |
| <b>After 4 weeks</b>                                                               |                     |                                     | <b>After 4 weeks</b> |                     |                                     |
| PBTZ+PZA                                                                           | 0.002               | Yes                                 | PBTZ+PZA             | 0.571               | No                                  |
| PBTZ+BDQ                                                                           | 0.004               | Yes                                 | PBTZ+BDQ             | 0.002               | Yes                                 |
| BDQ + PZA                                                                          | 0.001               | Yes                                 | BDQ + PZA            | 0.009               | Yes                                 |
| PBTZ+BDQ+PZA                                                                       | N/A                 | N/A                                 | PBTZ+BDQ+PZA         | 0.003               | Yes                                 |
| <b>After 8 weeks</b>                                                               |                     |                                     | <b>After 8 weeks</b> |                     |                                     |
| PBTZ+PZA                                                                           | 0.619               | No                                  | PBTZ+PZA             | 0.230               | No                                  |
| PBTZ+BDQ                                                                           | 0.251               | No                                  | PBTZ+BDQ             | 0.017               | Yes                                 |
| BDQ + PZA                                                                          | 0.144               | No                                  | BDQ+PZA              | 0.077               | No                                  |
| PBTZ+BDQ+PZA                                                                       | 0.046               | Yes                                 | PBTZ+BDQ+PZA         | 0.015               | Yes                                 |

<sup>1</sup> See Figure 9 for primary data
